# Supplementary material
Source: publisher site journal article supplement (https://www.dovepress.com/article/301363)
Supplement: Supplementary file 1 [file get_supplementary_file.php]

**Supplementary materials**

**METHOD**

**Study participants**

The Tianning Cohort is an on-going multi-center community-based prospective longitudinal study designed to identify new risk factors and potential therapeutic targets of CVD and related risk factors in Chinese adults. The protocols of this study were approved by the Ethics Committee of Soochow University (approval No. ECSU-201800051) and described in detail elsewhere.1 In brief, a total of 5,199 participants received a face-to-face interview, physical examination, urine and blood drawn at the baseline examination conducted in 2018, after giving a signed written informed consent. After excluding participants with missing data on either BMI or metabolic syndrome components (N=127), a total of 5,072 participants were included in the final analysis. All participants were free of diagnosed gout.

**Measurement of serum UA and definition of hyperuricemia**

Blood samples were obtained in the morning by venipuncture after a requested overnight fasting (at least 8 hours). Serum UA was measured by the Simens ADVIA Chemistry XPT system using commercial reagents (Siemens Healthcare Diagnostic Inc., Co Antrim, UK). Asymptomatic hyperuricemia was commonly diagnosed as serum UA above 420 μmol/L (7.0 mg/dl) for men and above 360 μmol/L (6.0 mg/dl) for women. This definition has been widely used in prior studies.2

**Measurement of metabolic disorders**

Typically, metabolic disorders included increased blood pressure, dyslipidemia, hyperglycemia, and central obesity, according to the Joint Interim Statement of the International Diabetes Federation Task Force on Epidemiology and Prevention.3 Blood pressure was measured 3 times by physicians using a standard mercury sphygmomanometer and a cuff of appropriate size, according to a standard protocol,4 after the participants had been resting for at least 5 minutes in a relaxed, sitting position. The first and fifth Korotkoff sounds were recorded as systolic blood pressure (SBP) and diastolic blood pressure (DBP), respectively. The mean of three measurements was used in the analyses. Waist circumference (WC) was measured at the level of 1 cm above the umbilicus. Lipids and fasting glucose were measured by the Simens ADVIA Chemistry XPT system using commercial reagents (Siemens Healthcare Diagnostic Inc., Co Antrim, UK). The definitions of each metabolic disorder were described in **Supplementary** **Table S1**.

**Definition of metabolically healthy and unhealthy obesity**

Body weight (kg) and height (cm) were measured when participants wore light clothes and no shoes by physicians. Body mass index (BMI) was calculated by dividing weight in kilograms by the square of height in meters (kg/m2). Obesity was diagnosed as BMI≥28 kg/m2.5 Obese participants with ≥3 of 5 metabolic disorders were defined as MUO and those with less than 3 metabolic disorders were treated as MHO.

**Assessment of confounding factors**

Data on demographic information, social-economic statues, lifestyle risk factors, and personal medical history were gathered applying standard questionnaires in the Chinese language administered by trained staff. Cigarette smoking was classified as current smoking, past smoking, and never smoking. Current smoking was defined as having smoked cigarettes regularly and smoking currently. Past smoking was defined as having smoked cigarettes regularly in the past but not smoking currently. Never smoking was defined as never smoked cigarettes. Alcohol consumption was classified as current drinkers or not. Current drinkers were those who had consumed any alcohol during the past year. Education level was estimated as years of under education. CKD was defined as an estimated glomerular filtration rates (eGFR) <60 ml/min per 1.73 m2. eGFRMDRD:175 × (Scr)−1.154 × (Age)−0.203 × (0.742 if Female).6 CVD was defined by the participants who suffered a stroke or coronary heart disease. Physical activity was determined using the Global Physical Activity Questionnaire (GPAQ) which was developed by the WHO for physical activity surveillance in developing countries.7 It collects information on physical activity at work, commuting, and recreational activities as well as sedentary behavior. Metabolic equivalent (MET) values defined as the ratio of metabolic rate to resting metabolic rate.8 The measured data were processed according to the GPAQ Analysis Guide, and MET-minutes per week values were calculated and used in data analysis. Sleep was assessed by a total score of the Pittsburgh Sleep Quality Index (PSQI), a widely used and well-validated measure of sleep quality.9

| **Supplementary** **Table S1.** Definitions of metabolic syndrome components | | |
| --- | --- | --- |
| Components |  | Definition |
| Central obesity |  | WC≥85 cm for men or WC≥80 cm for women |
| Elevated triglyceride |  | ≥1.70 mmol/L or under treatment |
| Reduced HDL-C |  | <1.00 mmol/L for men and <1.30 mmol/L for women or under treatment |
| Elevated blood pressure |  | ≥130/85 mmHg or under treatment |
| Elevated fasting glucose |  | ≥5.6 mmol/L or under treatment |

| **Supplementary** **Table S2.** Multivariate * adjusted associations between obesity-metabolic phenotypes and hyperuricemia in different genders | | | | | |
| --- | --- | --- | --- | --- | --- |
| obesity status | Serum UA | |  | Hyperuricemia | |
| β(SE) | *P* value |  | OR(95%CI) | *P* value |
| Male |  |  |  |  |  |
| MHNO | ref |  |  | 1.00(ref) |  |
| MUNO | 27.03(4.06) | <0.001 |  | 2.10(1.66-2.66) | <0.001 |
| MHO | 41.10(8.32) | <0.001 |  | 3.01(1.92-4.73) | <0.001 |
| MUO | 54.46(5.93) | <0.001 |  | 3.03(2.19-4.20) | <0.001 |
| Female |  |  |  |  |  |
| MHNO | ref |  |  | 1.00(ref) |  |
| MUNO | 39.71(3.00) | <0.001 |  | 3.32(2.59-4.26) | <0.001 |
| MHO | 38.23(6.72) | <0.001 |  | 3.65(2.22-5.99) | <0.001 |
| MUO | 66.44(4.79) | <0.001 |  | 6.71(4.75-9.48) | <0.001 |
| *adjusting for sex, age, smoke, drink, education level, eGFR, physical activity and sleep quality.  Hyperuricemia was defined as serum UA ≥7 mg/dl (420 mmol/L) in men or ≥6 mg/dl (360 mmol/L) in women.  MHNO: metabolically healthy non-obesity; MUNO: metabolically unhealthy non-obesity; MHO: metabolically healthy obesity; MUO: metabolically unhealthy obesity. | | | | | |

| **Supplementary** **Table S3.** Multivariate * adjusted associations between obesity-metabolic phenotypes and hyperuricemia after excluding participants with prevalent CVD and CKD | | | | | |
| --- | --- | --- | --- | --- | --- |
| obesity status | Serum UA | |  | Hyperuricemia | |
| β(SE) | *P* value |  | OR(95%CI) | *P* value |
| Excluding CKD |  |  |  |  |  |
| MHNO | ref |  |  | 1.00(ref) |  |
| MUNO | 36.44(2.51) | <0.001 |  | 2.75(2.31-3.26) | <0.001 |
| MHO | 42.02(5.34) | <0.001 |  | 3.40(2.46-4.71) | <0.001 |
| MUO | 61.81(3.84) | <0.001 |  | 4.73(3.72-6.00) | <0.001 |
| Excluding CVD |  |  |  |  |  |
| MHNO | ref |  |  | 1.00(ref) |  |
| MUNO | 36.29(2.45) | <0.001 |  | 2.76(2.31-3.29) | <0.001 |
| MHO | 43.09(5.28) | <0.001 |  | 3.28(2.35-4.58) | <0.001 |
| MUO | 64.19(3.79) | <0.001 |  | 4.59(3.53-5.75) | <0.001 |
| Excluding CVD and CKD |  |  |  |  |  |
| MHNO | ref |  |  | 1.00(ref) |  |
| MUNO | 36.46(2.51) | <0.001 |  | 2.77(2.32-3.32) | <0.001 |
| MHO | 43.09(5.34) | <0.001 |  | 3.35(2.40-4.68) | <0.001 |
| MUO | 62.49(3.86) | <0.001 |  | 4.62(3.61-5.92) | <0.001 |
| *adjusting for sex, age, smoke, drink, education level, eGFR, physical activity and sleep quality.  Hyperuricemia was defined as serum UA ≥7 mg/dl (420 mmol/L) in men or ≥6 mg/dl (360 mmol/L) in women.  MHNO: metabolically healthy non-obesity; MUNO: metabolically unhealthy non-obesity; MHO: metabolically healthy obesity; MUO: metabolically unhealthy obesity.  CKD: chronic kidney disease, eGFR <60 ml/min per 1.73 m2 ; CVD: cardiovascular disease. | | | | | |

**Reference**

1. Yu J, Sun H, Shang F, et al. Association Between Glucose Metabolism And Vascular Aging In Chinese Adults: A Cross-Sectional Analysis In The Tianning Cohort Study. *Clin Interv Aging.* 2019;14:1937-1946. doi:10.2147/CIA.S223690

2. Sui X, Church TS, Meriwether RA, Lobelo F, Blair SN. Uric acid and the development of metabolic syndrome in women and men. *Metabolism.* 2008;57(6):845-852. doi:10.1016/j.metabol.2008.01.030

3. Alberti KGMM, Eckel RH, Grundy SM, et al. Harmonizing the metabolic syndrome: a joint interim statement of the International Diabetes Federation Task Force on Epidemiology and Prevention; National Heart, Lung, and Blood Institute; American Heart Association; World Heart Federation; International Atherosclerosis Society; and International Association for the Study of Obesity. *Circulation.* 2009;120(16):1640-1645. doi:10.1161/CIRCULATIONAHA.109.192644

4. Chobanian AV, Bakris GL, Black HR, et al. The Seventh Report of the Joint National Committee on Prevention, Detection, Evaluation, and Treatment of High Blood Pressure: the JNC 7 report. *JAMA.* 2003;289(19):2560-2572. doi: 10.1001/jama.289.19.2560.

5. Zhou B-F. Predictive values of body mass index and waist circumference for risk factors of certain related diseases in Chinese adults--study on optimal cut-off points of body mass index and waist circumference in Chinese adults. *Biomed Environ Sci.* 2002;15(1):83-96. <https://pubmed.ncbi.nlm.nih.gov/12046553>

6. Hu J, Xu X, Zhang K, et al. Comparison of estimated glomerular filtration rates in Chinese patients with chronic kidney disease among serum creatinine-, cystatin-C- and creatinine-cystatin-C-based equations: A retrospective cross-sectional study. *Clin Chim Acta.* 2020;505:34-42. doi:10.1016/j.cca.2020.01.033

7. Armstrong T, Bull F. Development of the World Health Organization Global Physical Activity Questionnaire (GPAQ). *J Public Health.* 2006;14(2):66-70. https://doi.org/10.1007/s10389-006-0024-x

8. Misra P, Upadhyay RP, Krishnan A, Sharma N, Kapoor SK. A community based study to test the reliability and validity of physical activity measurement techniques. *Int J Prev Med.* 2014;5(8):952-959. <https://pubmed.ncbi.nlm.nih.gov/25489442/>

9. Buysse DJ, Reynolds CF, 3rd, Monk TH, Berman SR, Kupfer DJ. The Pittsburgh Sleep Quality Index: a new instrument for psychiatric practice and research. *Psychiatry Res.* 1989;28(2):193-213. doi: 10.1016/0165-1781(89)90047-4.
